# Supplementary material for: Umenocoleidae (Insecta: Dictyoptera) from Turonian sediments of Kzyl-Zhar, Kazakhstan and Cenomanian northern Myanmar amber
Source: Springer Nature journal article supplement (doi:10.1007/s11756-023-01356-z), 2023-04-12
Supplement: 11756_2023_1356_MOESM3_ESM.pdf [file 11756_2023_1356_MOESM3_ESM.pdf]

# Umenocoleidae (Insecta: Dictyoptera) from Turonian sediments of Kzyl-Zhar, Kazakhstan and Cenomanian northern Myanmar amber

Hemen Sendi<sup>1,2\*</sup>, Stéphane Le Tirant<sup>3</sup>, Helena Palková<sup>4</sup>, Dušan Chorvát<sup>5</sup>, Juraj Šurka<sup>6</sup>, Royce Cumming<sup>3,7,8</sup>

1 Institute of Zoology, Slovak Academy of Sciences, Dúbravská cesta 9, 845 06 Bratislava, Slovakia; [hemen.sendi@savba.sk](mailto:hemen.sendi@savba.sk)

2 Faculty of Natural Sciences, Ilkovičova 6, Bratislava, 84104, Slovakia

3 Montreal Insectarium, 4101 rue Sherbrooke est, Montréal, Québec, H1X 2B2, Canada [sletirant@ville.montreal.qc.ca](mailto:sletirant@ville.montreal.qc.ca)

4 Slovak Academy of Sciences, Institute of Inorganic Chemistry, Dúbravská cesta 9, Bratislava 84 536, Slovakia  
[Helena.Palkova@savba.sk](mailto:Helena.Palkova@savba.sk)

5 International Laser Centre, Ilkovicova 3, 841 04, Bratislava, Slovakia [dusan.chorvat@cvtisr.sk](mailto:dusan.chorvat@cvtisr.sk)

6 Earth Science Institute, Slovak Academy of Sciences, Ďumbierska 1, 974 01 Banská Bystrica, Slovakia [surka@savbb.sk](mailto:surka@savbb.sk)

7 Richard Gilder Graduate School, American Museum of Natural History, New York, NY 10024, USA

8 Biology, Graduate Center, City University of New York, NY, USA; [phylliidae.walkingleaf@gmail.com](mailto:phylliidae.walkingleaf@gmail.com)

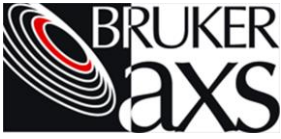

Company

Department

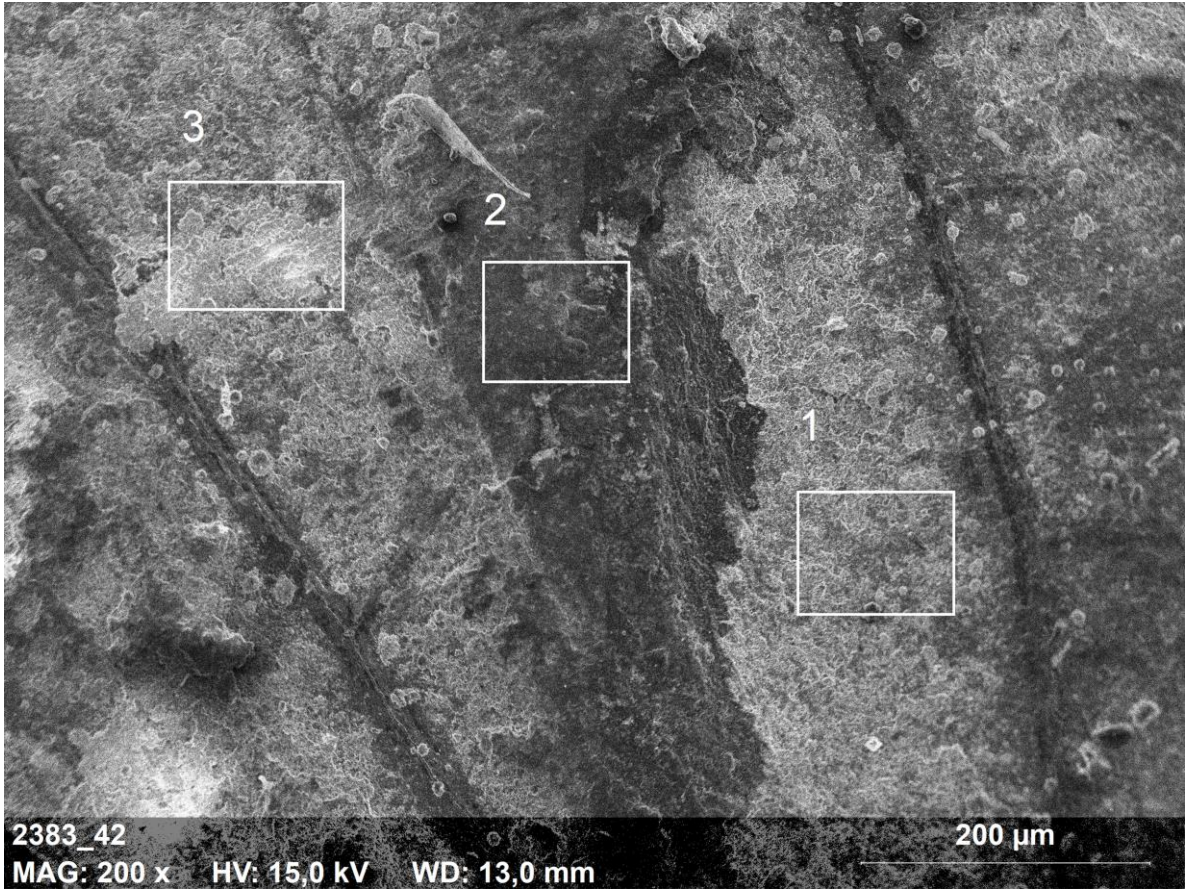

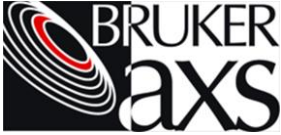

# Company

Department

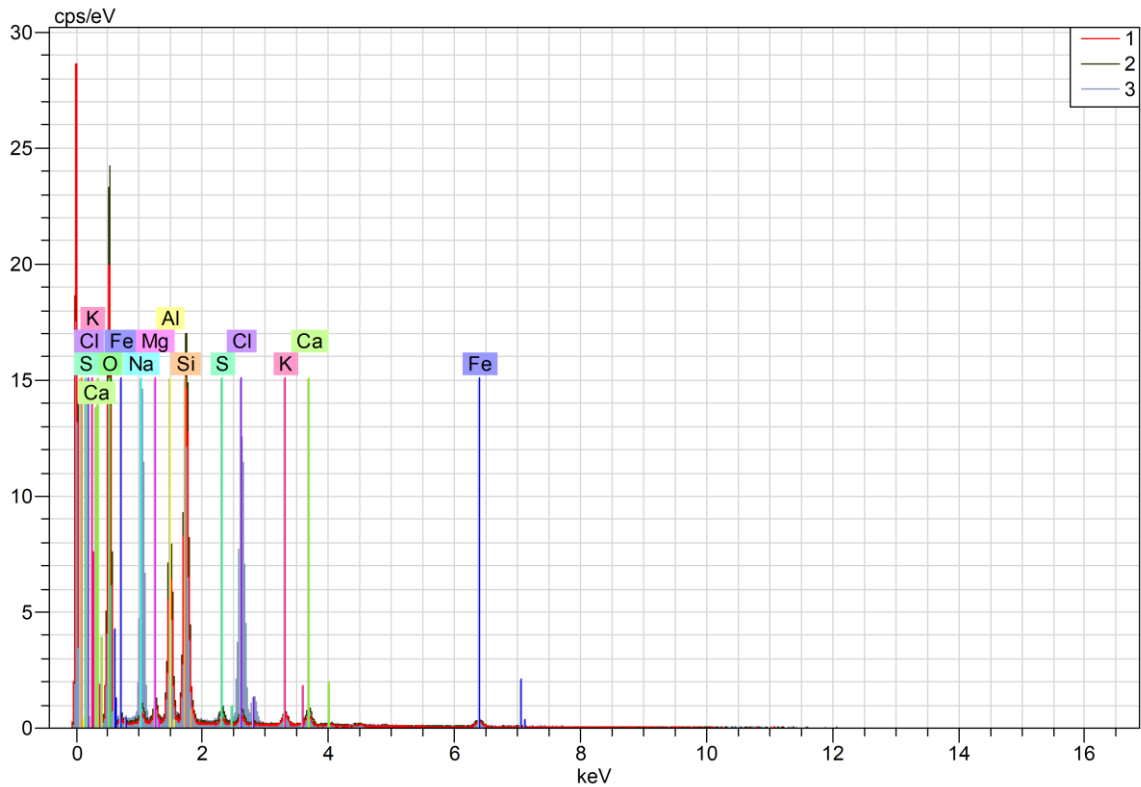

Bruker AXS Microanalysis GmbH, Germany

Quantification results

Mass percent (%)

| Spectrum    | O     | Na    | Mg   | Al    | Si    | S    | Cl    | K    | Ca   | Fe   |
|-------------|-------|-------|------|-------|-------|------|-------|------|------|------|
| 1           | 57,32 | 0,75  | 1,00 | 10,45 | 24,13 | 0,64 | 0,91  | 1,71 | 1,51 | 4,32 |
| 2           | 55,68 | 0,88  | 0,75 | 8,46  | 18,74 | 1,22 | 1,18  | 1,57 | 2,28 | 4,12 |
| 3           | 36,49 | 17,15 | 0,57 | 6,41  | 14,28 | 0,91 | 23,25 | 1,12 | 1,76 | 3,01 |
| Mean value: | 49,83 | 6,26  | 0,77 | 8,44  | 19,05 | 0,92 | 8,44  | 1,47 | 1,85 | 3,82 |
| Sigma:      | 11,59 | 9,43  | 0,21 | 2,02  | 4,93  | 0,29 | 12,82 | 0,30 | 0,39 | 0,71 |
| Sigma mean: | 6,69  | 5,44  | 0,12 | 1,17  | 2,85  | 0,17 | 7,40  | 0,18 | 0,23 | 0,41 |

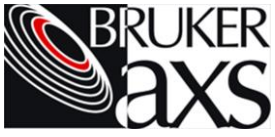

# Company

Department

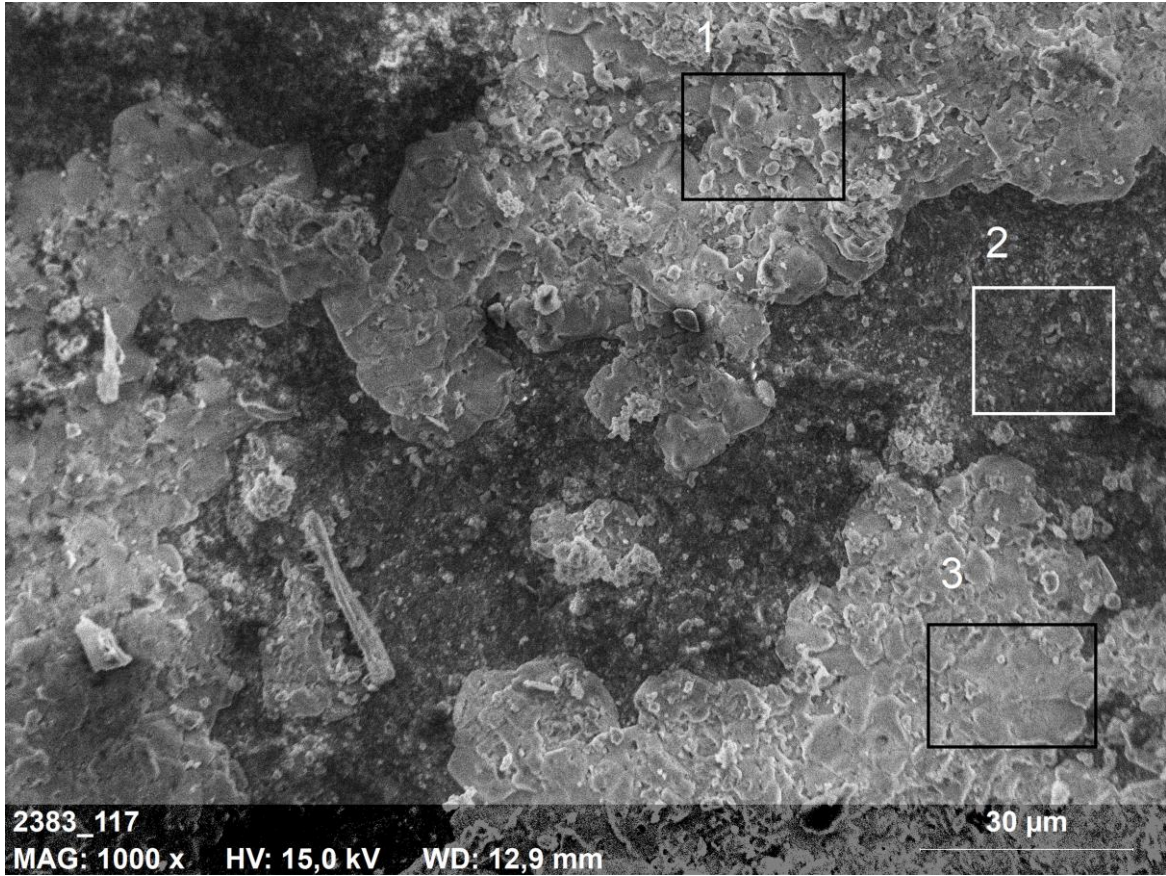

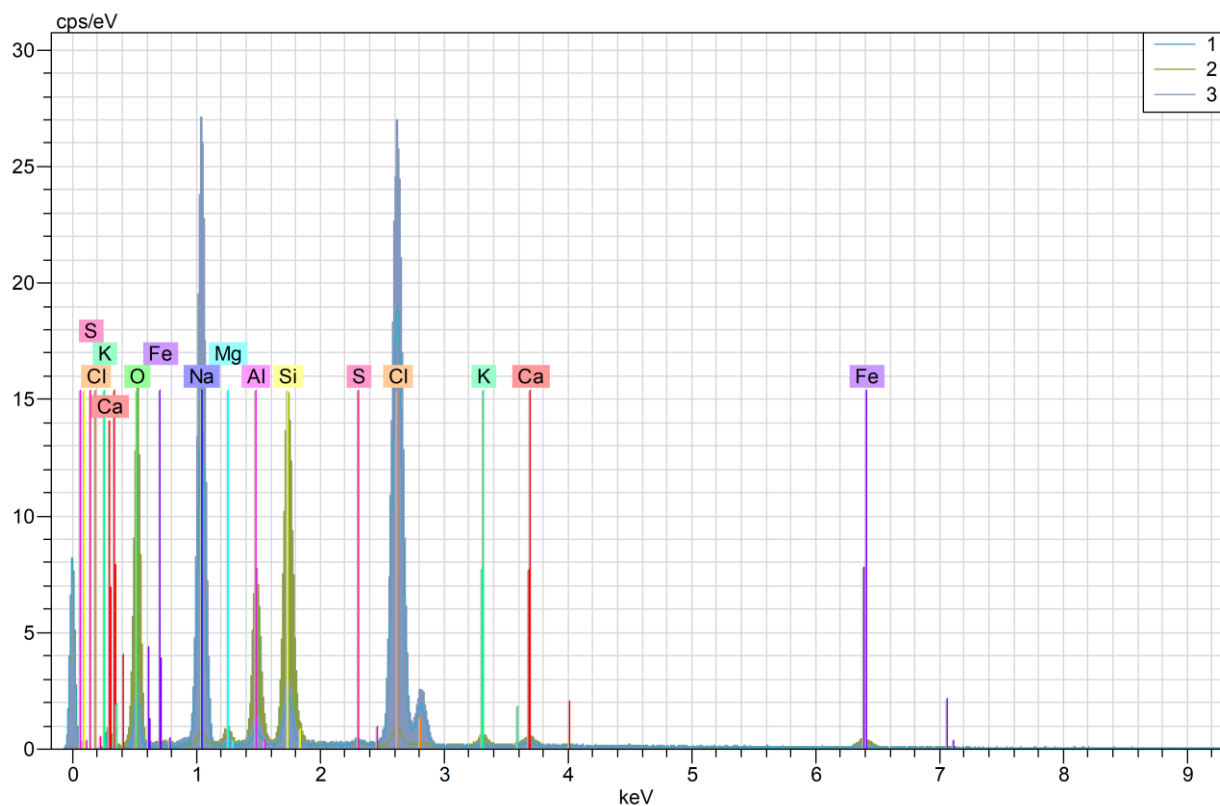

1

Puls th.: 4,81 kcps

Bruker AXS Microanalysis GmbH, Germany

Quantification results

Mass percent (%)

| Spectrum    | O     | Na    | Mg   | Al    | Si    | S    | Cl    | K    | Ca   | Fe   |
|-------------|-------|-------|------|-------|-------|------|-------|------|------|------|
| 1           | 10,83 | 36,16 | 0,04 | 1,64  | 5,27  | 0,86 | 66,44 | 0,40 | 0,95 | 1,03 |
| 2           | 50,53 | 1,17  | 1,12 | 11,88 | 27,21 | 0,35 | 2,01  | 1,22 | 1,26 | 4,26 |
| 3           | 10,55 | 36,16 | 0,24 | 1,98  | 4,42  | 0,40 | 59,42 | 0,43 | 0,82 | 0,86 |
| Mean value: | 23,97 | 24,50 | 0,47 | 5,17  | 12,30 | 0,53 | 42,62 | 0,68 | 1,01 | 2,05 |
| Sigma:      | 23,00 | 20,20 | 0,57 | 5,81  | 12,92 | 0,28 | 35,35 | 0,46 | 0,22 | 1,92 |
| Sigma mean: | 13,28 | 11,66 | 0,33 | 3,36  | 7,46  | 0,16 | 20,41 | 0,27 | 0,13 | 1,11 |

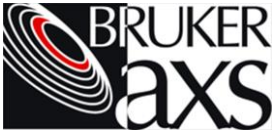

Company

Department

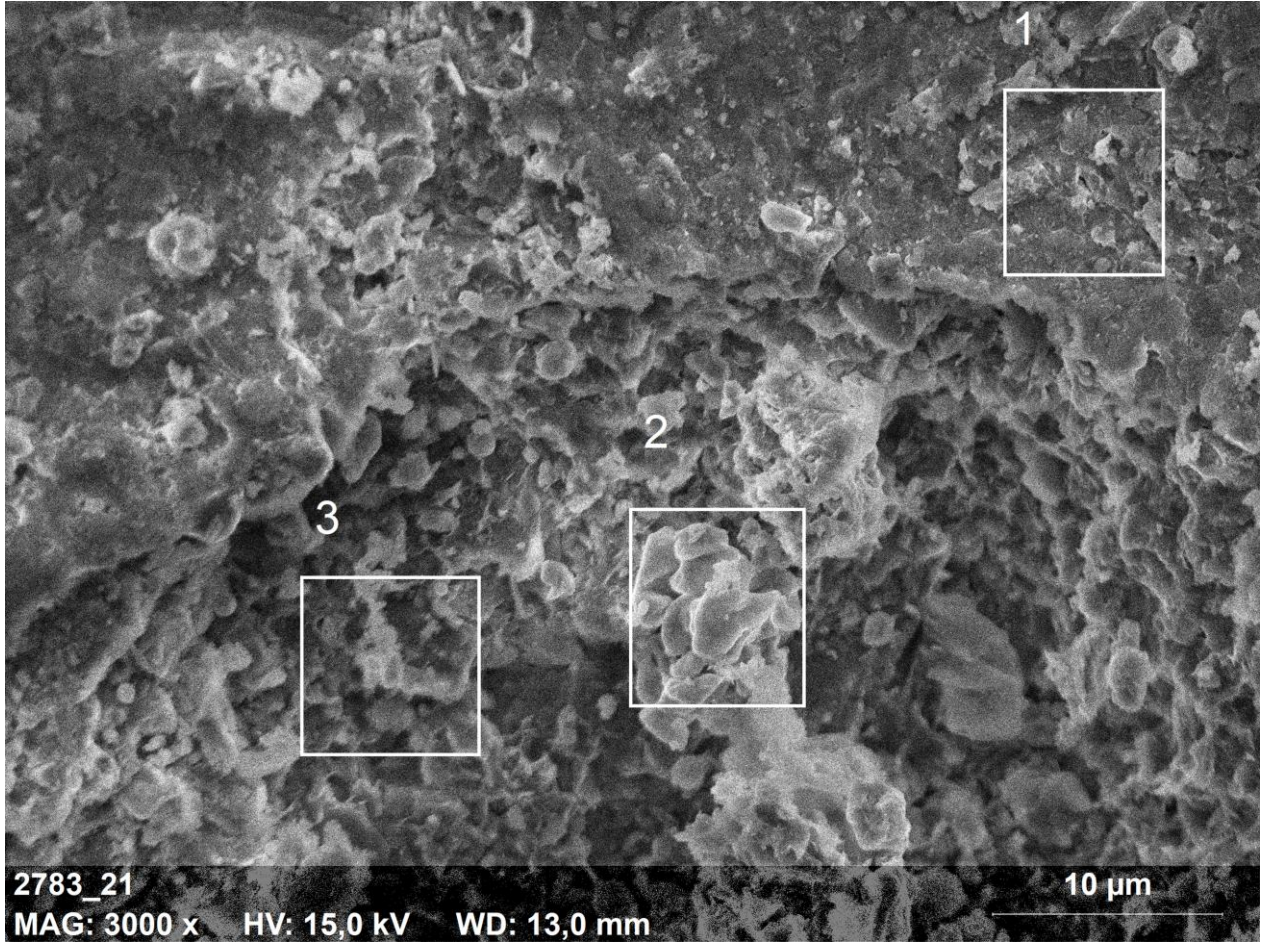

2783\_21

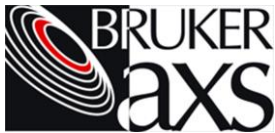

# Company

Department

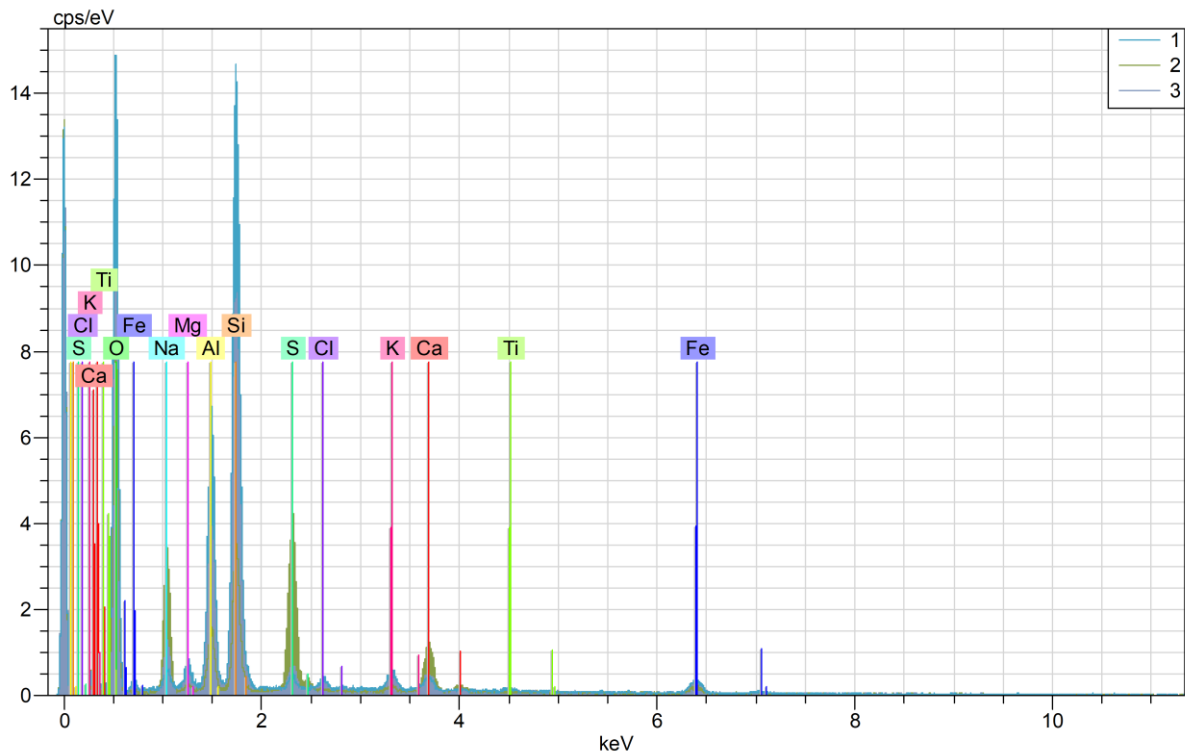

1

Puls th.: 4,52 kcps

Bruker AXS Microanalysis GmbH, Germany

Quantification results

Mass percent (%)

| Spectrum | O | Na | Mg | Al | Si | S | Cl | K | Ca | Ti |
|----------|---|----|----|----|----|---|----|---|----|----|
| Fe       |   |    |    |    |    |   |    |   |    |    |

---

|      |       |       |      |       |       |       |      |      |      |      |
|------|-------|-------|------|-------|-------|-------|------|------|------|------|
| 1    | 51,41 | 1,18  | 1,30 | 12,40 | 30,00 | 0,76  | 0,65 | 1,60 | 1,06 | 0,50 |
| 5,12 |       |       |      |       |       |       |      |      |      |      |
| 2    | 63,14 | 15,32 | 0,53 | 5,03  | 11,58 | 13,90 | 0,30 | 0,74 | 6,29 | 0,39 |
| 2,52 |       |       |      |       |       |       |      |      |      |      |
| 3    | 48,34 | 4,67  | 1,50 | 12,89 | 29,32 | 2,29  | 0,73 | 1,63 | 2,07 | 0,92 |
| 4,54 |       |       |      |       |       |       |      |      |      |      |

---

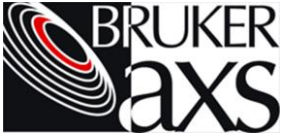

# Company

Department

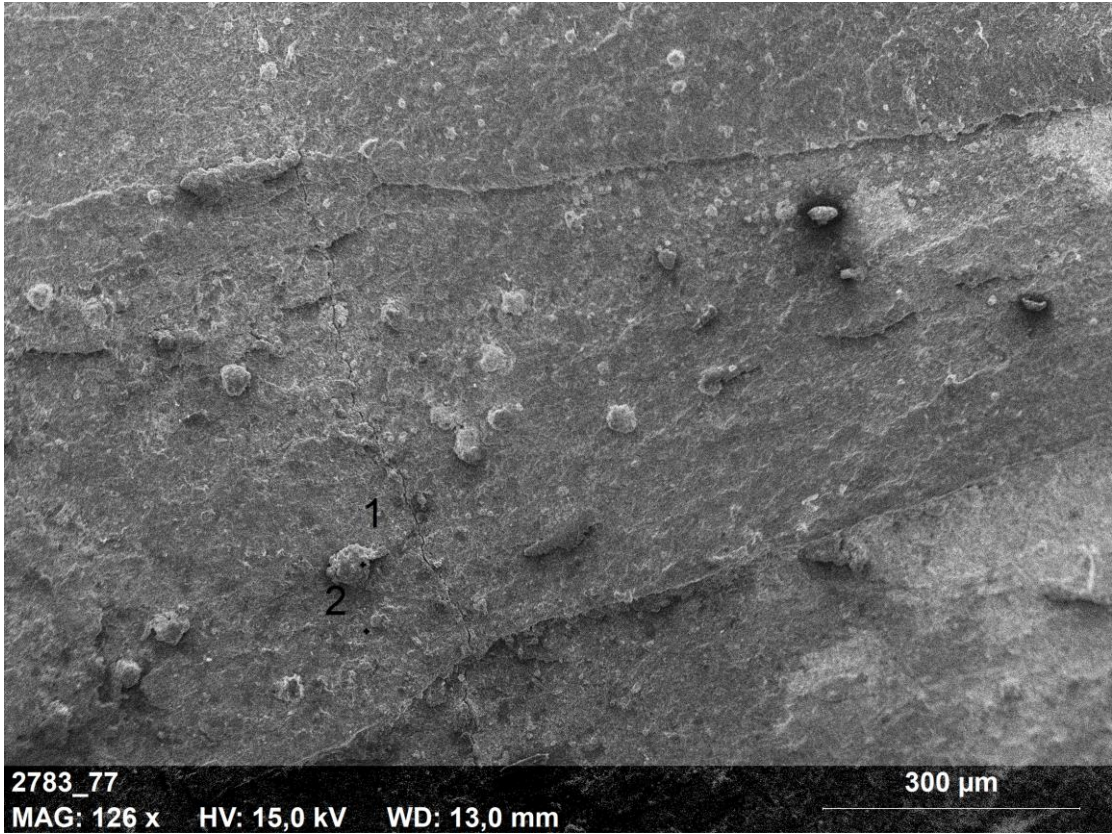



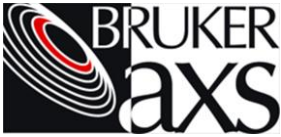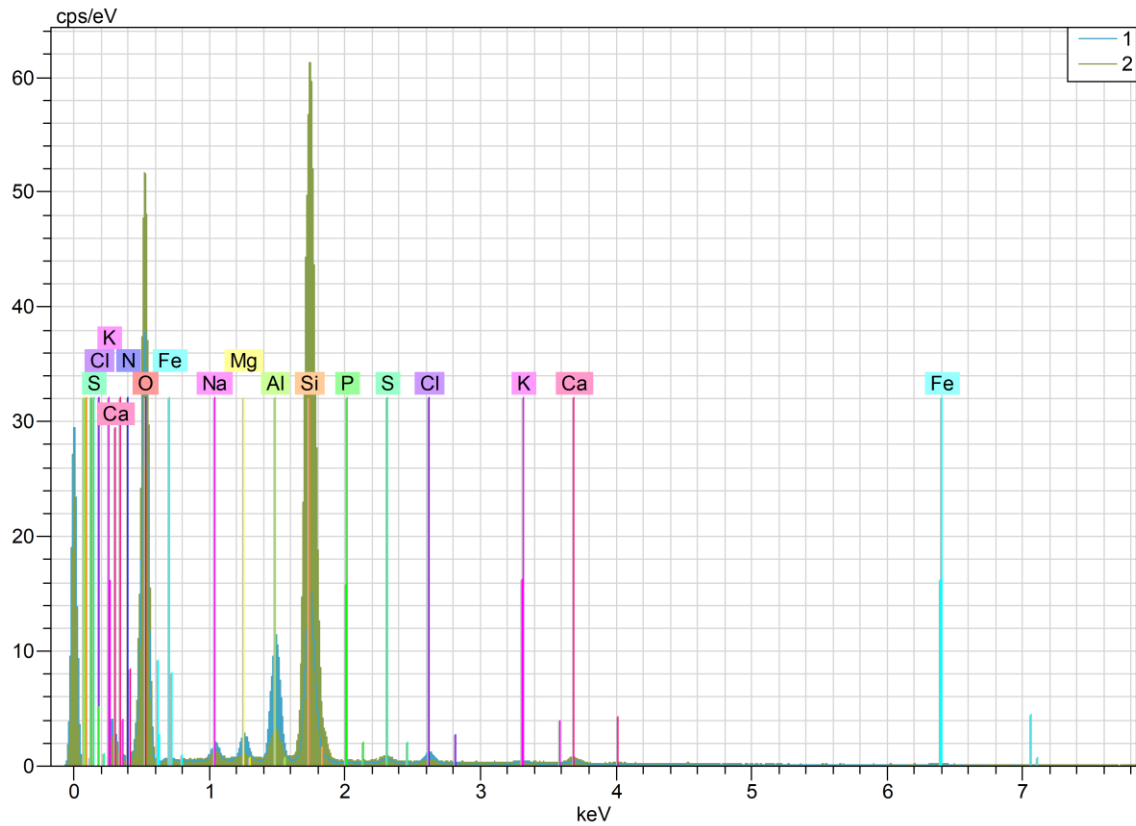

Bruker AXS Microanalysis GmbH, Germany

Quantification results

Mass percent (%)

| Spectrum | Ca | Fe | N | O | Na | Mg | Al | Si | P | S | Cl | K |
|----------|----|----|---|---|----|----|----|----|---|---|----|---|
|----------|----|----|---|---|----|----|----|----|---|---|----|---|

-----  
-----

|   |      |      |      |       |      |      |      |       |      |      |      |      |
|---|------|------|------|-------|------|------|------|-------|------|------|------|------|
| 1 | 0,83 | 2,67 | 0,00 | 61,78 | 1,16 | 1,43 | 7,36 | 11,67 | 0,01 | 0,26 | 1,29 | 0,69 |
|---|------|------|------|-------|------|------|------|-------|------|------|------|------|

|   |      |      |      |       |      |      |      |       |      |      |      |      |
|---|------|------|------|-------|------|------|------|-------|------|------|------|------|
| 2 | 0,70 | 1,00 | 0,00 | 60,99 | 0,40 | 0,06 | 1,21 | 34,09 | 0,02 | 0,37 | 0,16 | 0,30 |
|---|------|------|------|-------|------|------|------|-------|------|------|------|------|

-----  
-----

-----



Company

Department

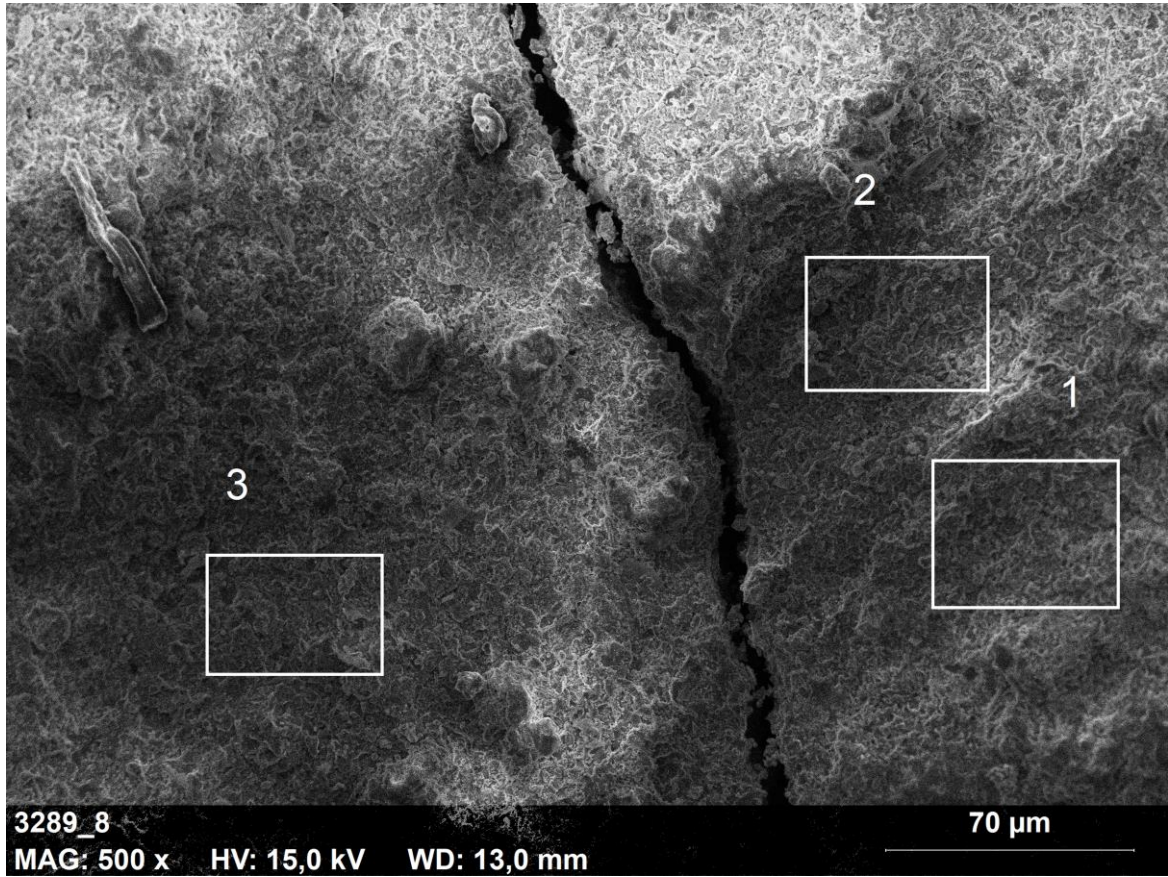

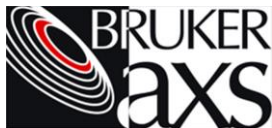

# Company

Department

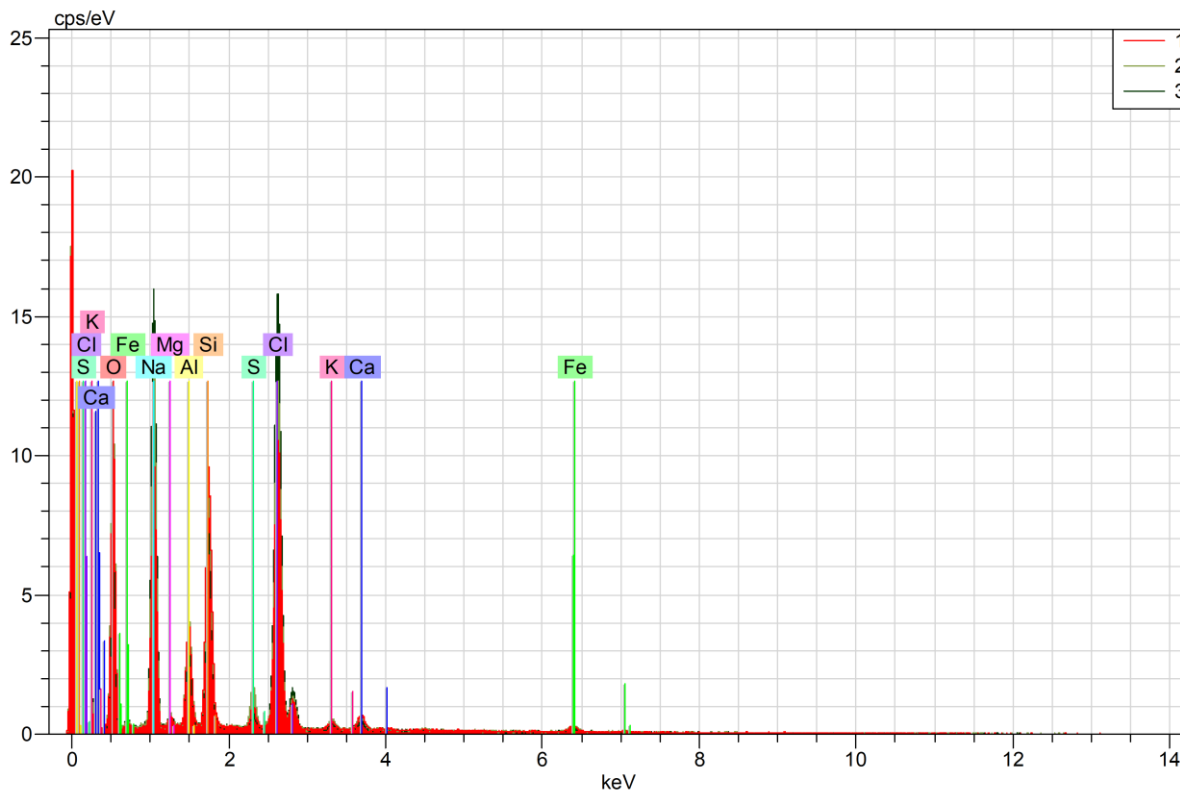

1

Puls th.: 6.07 kcps

Bruker AXS Microanalysis GmbH, Germany

Quantification results

Mass percent (%)

| Spectrum    | O     | Na    | Mg   | Al   | Si    | S    | Cl    | K    | Ca   | Fe   |
|-------------|-------|-------|------|------|-------|------|-------|------|------|------|
| 1           | 35,14 | 20,15 | 0,66 | 6,10 | 15,03 | 1,81 | 27,97 | 1,09 | 1,92 | 2,72 |
| 2           | 35,14 | 20,58 | 0,43 | 5,26 | 11,59 | 2,78 | 29,24 | 1,08 | 1,32 | 2,66 |
| 3           | 28,82 | 23,42 | 0,40 | 4,54 | 10,83 | 0,84 | 35,89 | 0,83 | 1,01 | 2,31 |
| Mean value: | 33,03 | 21,38 | 0,50 | 5,30 | 12,48 | 1,81 | 31,04 | 1,00 | 1,41 | 2,57 |
| Sigma:      | 3,65  | 1,77  | 0,14 | 0,78 | 2,24  | 0,97 | 4,26  | 0,15 | 0,47 | 0,22 |
| Sigma mean: | 2,11  | 1,02  | 0,08 | 0,45 | 1,29  | 0,56 | 2,46  | 0,09 | 0,27 | 0,13 |
