# Supplementary material for: Umenocoleidae (Insecta: Dictyoptera) from Turonian sediments of Kzyl-Zhar, Kazakhstan and Cenomanian northern Myanmar amber
Source: Springer Nature journal article supplement (doi:10.1007/s11756-023-01356-z), 2023-04-12
Supplement: 11756_2023_1356_MOESM4_ESM.pdf [file 11756_2023_1356_MOESM4_ESM.pdf]

a



b



**Fig. 1** Micro-CT images of umenocoleid wing imprints from Kzyl-Zhar, Kazakhstan. **a** Forewing ([8.69/3.14 mm](#)) of *N. angustata* (PIN 2383/117). **b** Forewing (7.56/2.72 mm) of *Umenotypus maculatus* (PIN 2383/108). The calculated area of the wings is indicated with a line drawing of the wing contours.
